# Supplementary material for: Comprehensive Gene Expression Analyses of Immunohistochemically Defined Subgroups of Muscle-Invasive Urinary Bladder Urothelial Carcinoma
Source: MDPI journal article supplement (doi:10.3390/ijms22020628), 2021-01-10
Supplement: s1 [file s1]

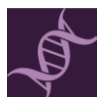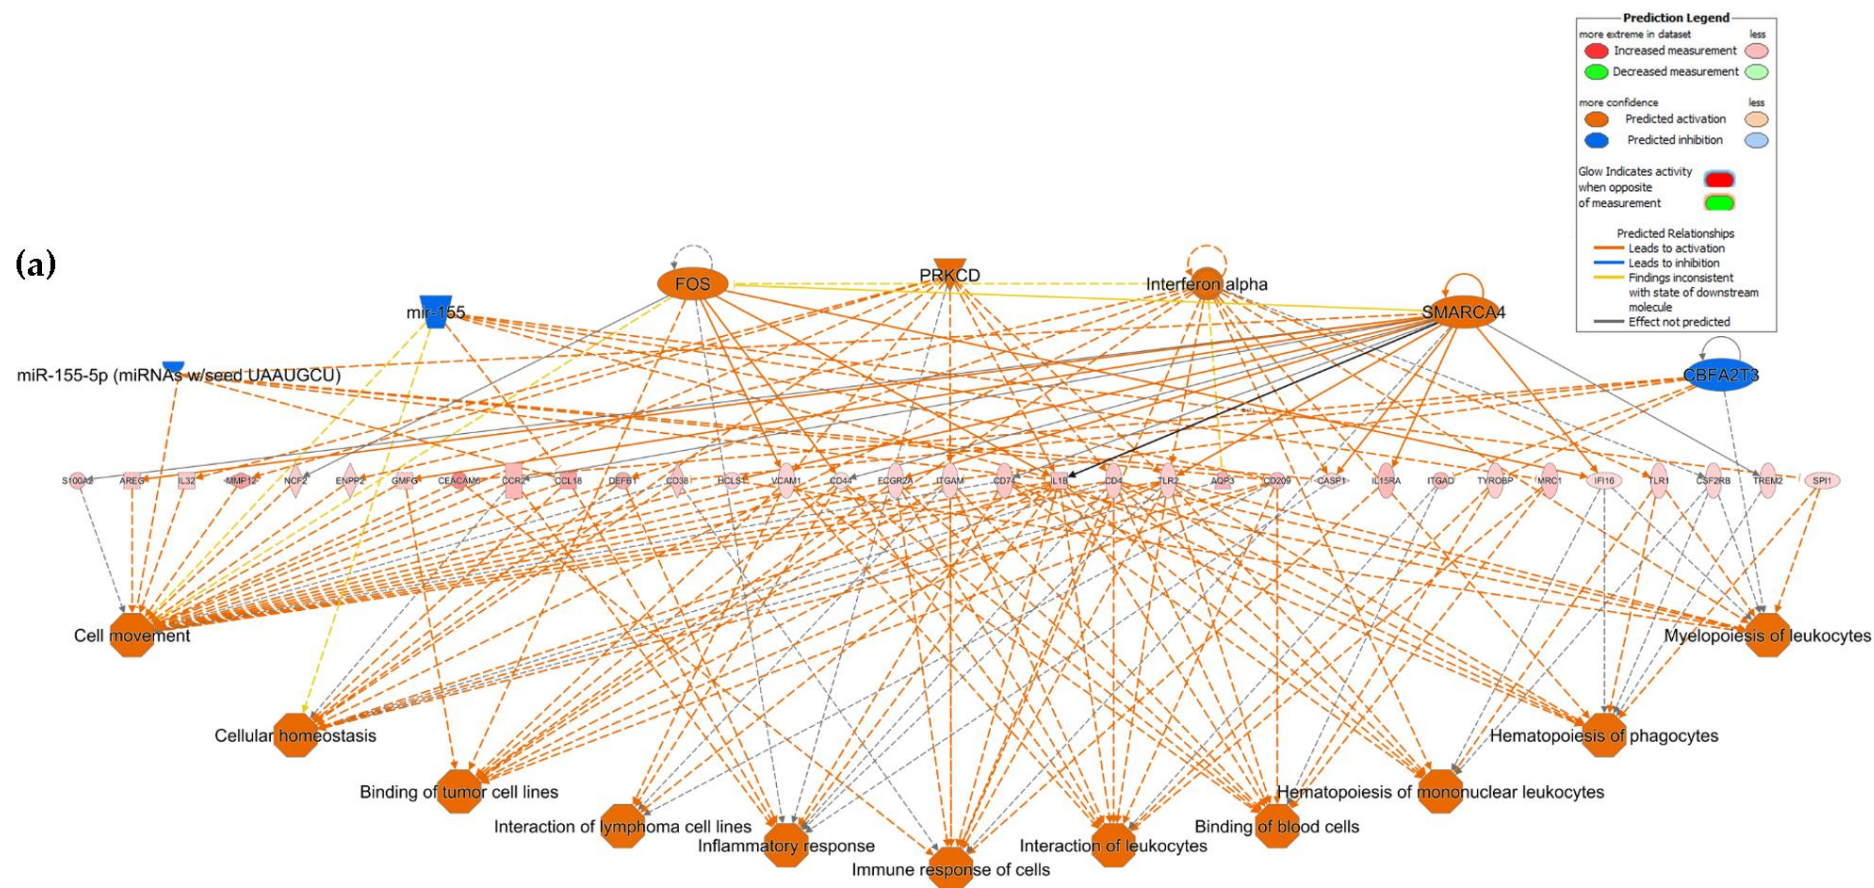

(b)

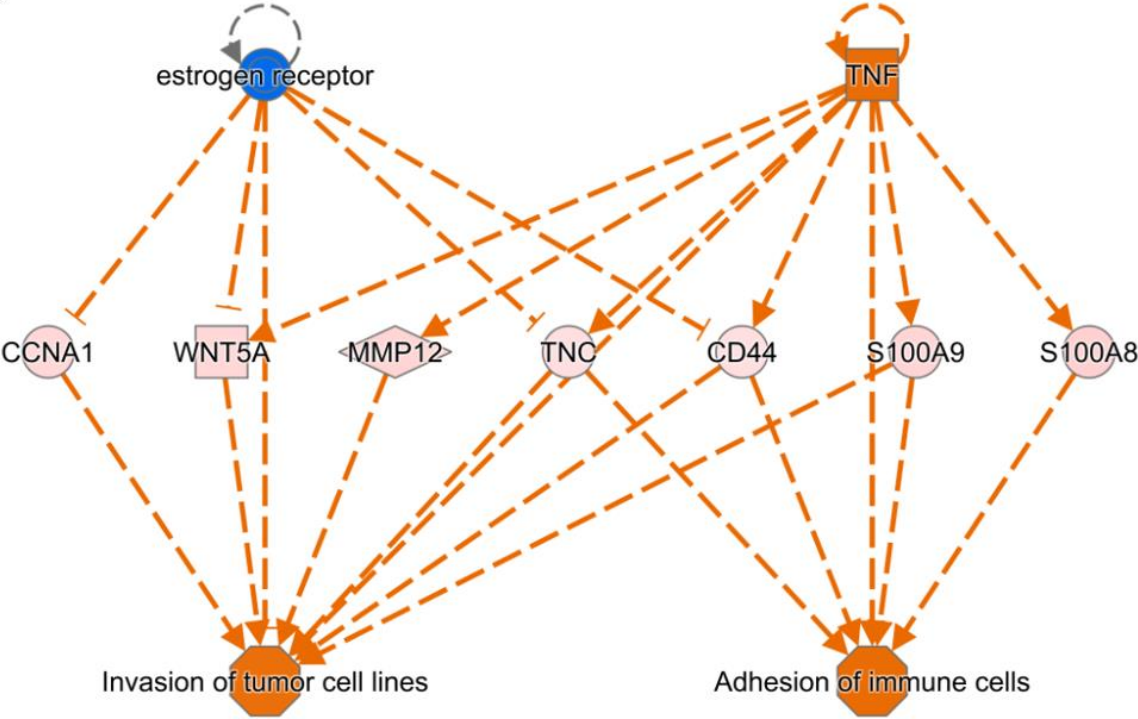

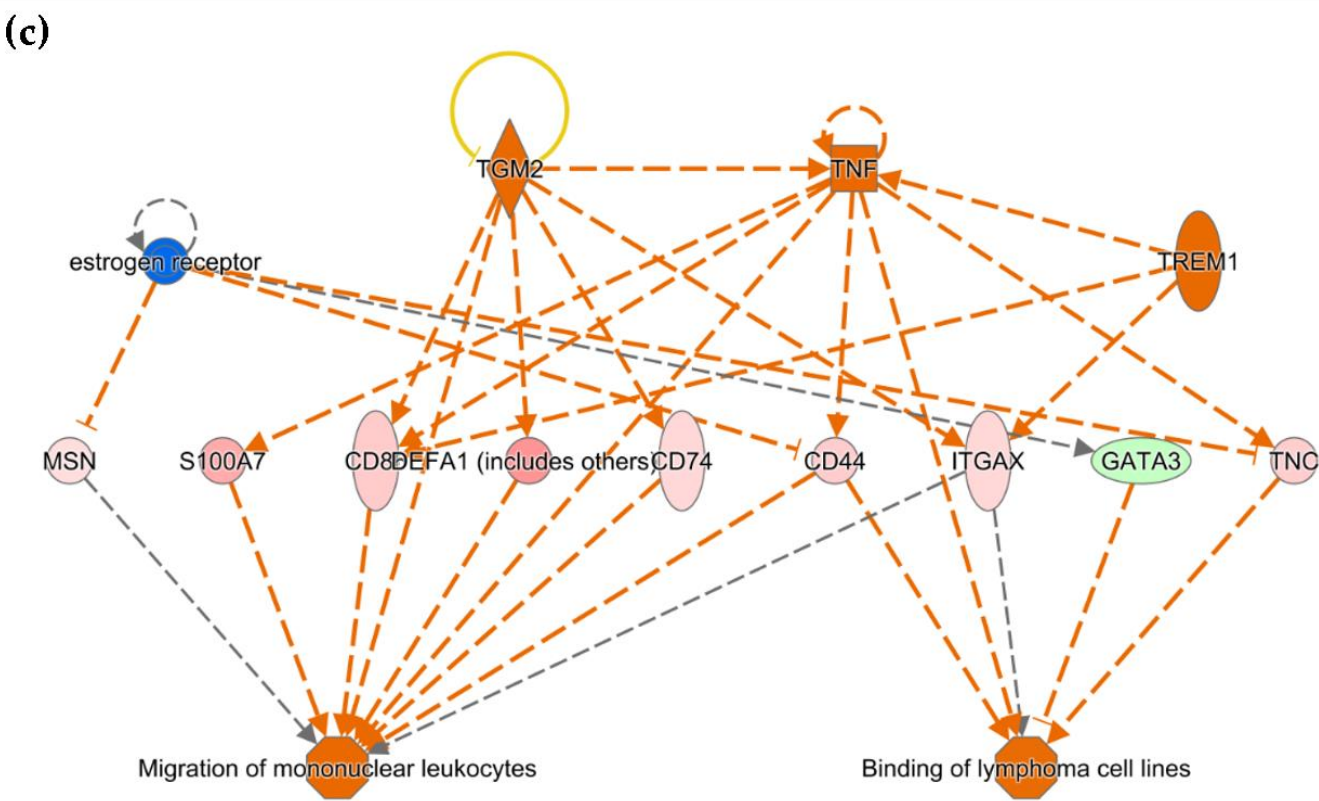

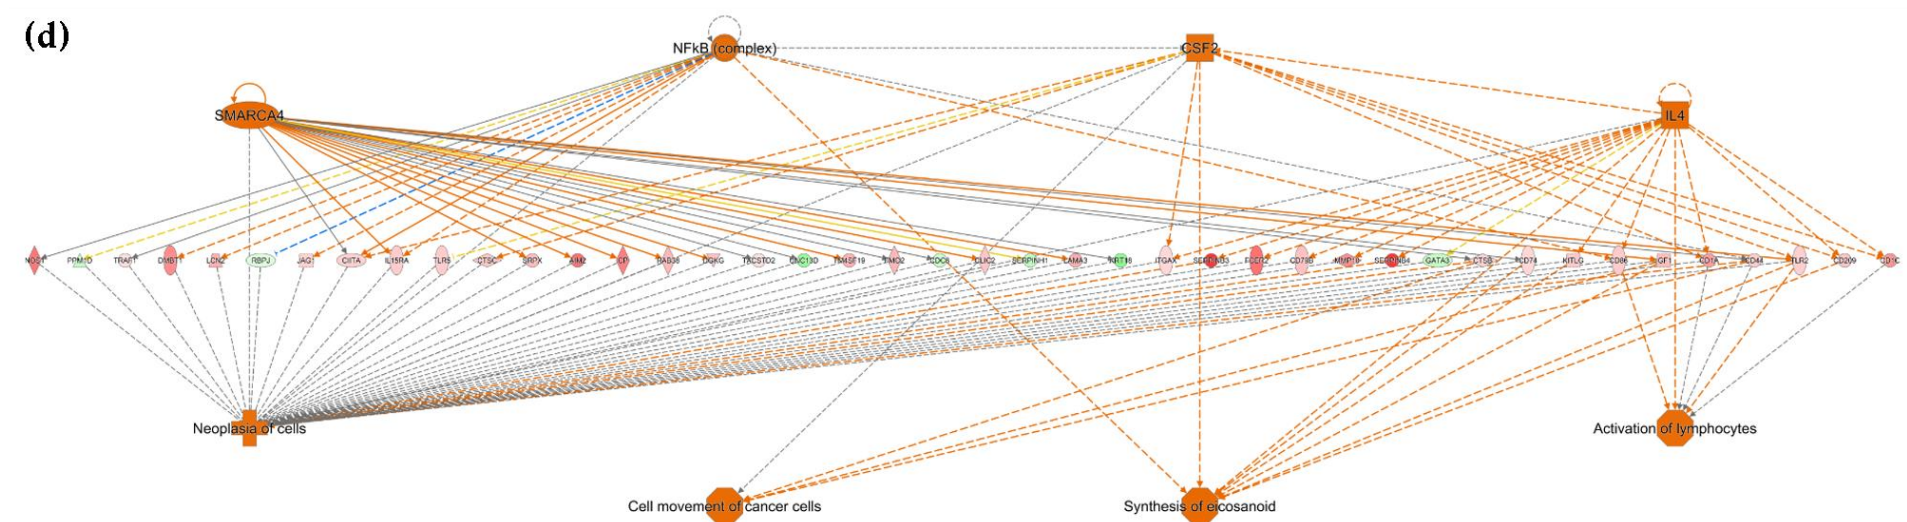

**Figure S1.** The Ingenuity Pathways Analysis results; Regulator effect between four subgroups: (a) DP vs DN; (b) CK5/6 SP vs CK20 SP; (c) CK5/6 SP vs DN; (d) CK5/6 SP vs DN.
